# Supplementary material for: Expression of Autophagy-Related Proteins in Different Types of Thyroid Cancer
Source: PubMed Central journal article supplement (PMC5372556; doi:10.3390/ijms18030540), 2017-03-02
Supplement: ijms-18-00540-s001.pdf [file ijms-18-00540-s001.pdf]

# Supplementary Materials: Expression of Autophagy-Related Proteins in Thyroid Cancer

Hye Min Kim, Eun-Sol Kim, Ja Seung Koo

**Table S1.** Basal characteristics of thyroid papillary carcinoma.

| Parameters         | Total <i>n</i> = 342 (%) | Histologic Subtype                   |                                      | <i>p</i> -Value | BRAF V600E Mutation Status     |                             | <i>p</i> -Value |
|--------------------|--------------------------|--------------------------------------|--------------------------------------|-----------------|--------------------------------|-----------------------------|-----------------|
|                    |                          | Conventional Type <i>n</i> = 302 (%) | Follicular Variant <i>n</i> = 40 (%) |                 | No Mutation <i>n</i> = 106 (%) | Mutation <i>n</i> = 236 (%) |                 |
| Age (years)        |                          |                                      |                                      | 0.738           |                                |                             | 0.088           |
| <45                | 154 (45.0)               | 135 (44.7)                           | 19 (47.5)                            |                 | 55 (51.9)                      | 99 (41.9)                   |                 |
| ≥45                | 188 (55.0)               | 167 (55.3)                           | 21 (52.5)                            |                 | 51 (48.1)                      | 137 (58.1)                  |                 |
| Sex                |                          |                                      |                                      | 0.945           |                                |                             | 0.212           |
| Male               | 67 (19.6)                | 59 (19.5)                            | 8 (20.0)                             |                 | 25 (23.6)                      | 42 (17.8)                   |                 |
| Female             | 275 (80.4)               | 243 (80.5)                           | 32 (80.0)                            |                 | 81 (76.4)                      | 194 (82.2)                  |                 |
| Tumor size (cm)    |                          |                                      |                                      | 0.948           |                                |                             | 0.527           |
| ≤2.0               | 270 (78.9)               | 238 (78.8)                           | 32 (80.0)                            |                 | 80 (75.5)                      | 190 (80.5)                  |                 |
| >2.0, ≤4.0         | 65 (19.0)                | 58 (19.2)                            | 7 (17.5)                             |                 | 23 (21.7)                      | 42 (17.8)                   |                 |
| >4.0               | 7 (2.0)                  | 6 (2.0)                              | 1 (2.5)                              |                 | 3 (2.8)                        | 4 (1.7)                     |                 |
| Tumor margin       |                          |                                      |                                      | <b>0.002</b>    |                                |                             | <b>0.004</b>    |
| Infiltrative       | 287 (83.9)               | 260 (86.1)                           | 27 (67.5)                            |                 | 80 (75.5)                      | 207 (87.7)                  |                 |
| Expanding          | 55 (16.1)                | 42 (13.9)                            | 13 (32.5)                            |                 | 26 (24.5)                      | 29 (12.3)                   |                 |
| Tumor extension    |                          |                                      |                                      | 0.344           |                                |                             | 0.193           |
| Intrathyroidal     | 106 (31.0)               | 91 (30.1)                            | 15 (37.5)                            |                 | 38 (35.8)                      | 68 (28.8)                   |                 |
| Extrathyroidal     | 236 (69.0)               | 211 (69.9)                           | 25 (62.5)                            |                 | 68 (64.2)                      | 168 (71.2)                  |                 |
| Histologic subtype |                          |                                      |                                      |                 |                                |                             | <0.001          |
| Conventional       |                          |                                      |                                      |                 | 81 (76.4)                      | 221 (93.6)                  |                 |
| Follicular         |                          |                                      |                                      |                 | 25 (23.6)                      | 15 (6.4)                    |                 |
| LN metastasis      |                          |                                      |                                      | 0.186           |                                |                             | 0.085           |
| No                 | 138 (40.4)               | 118 (39.1)                           | 20 (50.0)                            |                 | 50 (47.2)                      | 88 (37.3)                   |                 |
| Yes                | 204 (59.6)               | 184 (60.9)                           | 20 (50.0)                            |                 | 56 (52.8)                      | 148 (62.7)                  |                 |
| Distant metastasis |                          |                                      |                                      | 0.937           |                                |                             | 0.457           |
| No                 | 324 (94.7)               | 286 (94.7)                           | 38 (95.0)                            |                 | 99 (93.4)                      | 225 (95.3)                  |                 |
| Yes                | 18 (5.3)                 | 16 (5.3)                             | 2 (5.0)                              |                 | 7 (6.6)                        | 11 (4.7)                    |                 |
| Treatment          |                          |                                      |                                      | 0.153           |                                |                             | 0.063           |
| No treatment       | 74 (21.6)                | 62 (20.5)                            | 12 (30.0)                            |                 | 29 (27.4)                      | 45 (19.1)                   |                 |
| I-131 therapy      | 266 (77.8)               | 238 (78.8)                           | 28 (70.0)                            |                 | 77 (72.6)                      | 189 (80.1)                  |                 |
| Chemotherapy       | 0 (0.0)                  | 0 (0.0)                              | 0 (0.0)                              |                 | 0 (0.0)                        | 0 (0.0)                     |                 |
| Radiotherapy       | 2 (0.6)                  | 2 (0.7)                              | 0 (0.0)                              |                 | 0 (0.0)                        | 2 (0.8)                     |                 |

Bold indicates statistically significant (*p* < 0.05).

**Table S2.** Basal characteristics of thyroid follicular carcinoma.

| Parameters         | Total <i>n</i> = 112 (%) | FC, Minimally Invasive Type <i>n</i> = 99 (%) | FC, Widely Invasive Type <i>n</i> = 13 (%) | <i>p</i> -Value  |
|--------------------|--------------------------|-----------------------------------------------|--------------------------------------------|------------------|
| Age (years)        |                          |                                               |                                            | 0.255            |
| <45                | 51 (45.5)                | 47 (47.5)                                     | 4 (30.8)                                   |                  |
| ≥45                | 61 (54.5)                | 52 (52.5)                                     | 9 (69.2)                                   |                  |
| Sex                |                          |                                               |                                            | 0.233            |
| Male               | 28 (25.0)                | 23 (23.2)                                     | 5 (38.5)                                   |                  |
| Female             | 84 (75.0)                | 76 (76.8)                                     | 8 (61.5)                                   |                  |
| Tumor size (cm)    |                          |                                               |                                            | <b>0.040</b>     |
| ≤2.0               | 34 (30.4)                | 34 (34.3)                                     | 0 (0.0)                                    |                  |
| >2.0, ≤4.0         | 49 (43.8)                | 41 (41.4)                                     | 8 (61.5)                                   |                  |
| >4.0               | 29 (25.9)                | 24 (24.2)                                     | 5 (38.5)                                   |                  |
| Capsular invasion  |                          |                                               |                                            | 0.147            |
| No                 | 14 (12.5)                | 14 (14.1)                                     | 0 (0.0)                                    |                  |
| Yes                | 98 (87.5)                | 85 (85.9)                                     | 13 (100.0)                                 |                  |
| Vascular invasion  |                          |                                               |                                            | <b>0.028</b>     |
| No                 | 66 (58.9)                | 62 (62.6)                                     | 4 (30.8)                                   |                  |
| Yes                | 46 (41.1)                | 37 (37.4)                                     | 9 (69.2)                                   |                  |
| Tumor extension    |                          |                                               |                                            | <b>&lt;0.001</b> |
| Intrathyroidal     | 95 (84.8)                | 89 (89.9)                                     | 6 (46.2)                                   |                  |
| Extrathyroidal     | 17 (15.2)                | 10 (10.1)                                     | 7 (53.8)                                   |                  |
| LN metastasis      |                          |                                               |                                            | 0.220            |
| No                 | 110 (98.2)               | 98 (99.0)                                     | 12 (92.3)                                  |                  |
| Yes                | 2 (1.8)                  | 1 (1.0)                                       | 1 (7.7)                                    |                  |
| Distant metastasis |                          |                                               |                                            | <b>0.003</b>     |
| No                 | 101 (90.2)               | 93 (93.9)                                     | 8 (61.5)                                   |                  |
| Yes                | 11 (9.8)                 | 6 (6.1)                                       | 5 (38.5)                                   |                  |
| Treatment          |                          |                                               |                                            | <b>&lt;0.001</b> |
| No treatment       | 66 (58.9)                | 66 (66.7)                                     | 0 (0.0)                                    |                  |
| I-131 therapy      | 35 (31.3)                | 28 (28.3)                                     | 7 (53.8)                                   |                  |
| Chemotherapy       | 1 (0.9)                  | 0 (0.0)                                       | 1 (7.7)                                    |                  |
| Radiotherapy       | 10 (8.9)                 | 5 (5.1)                                       | 5 (38.5)                                   |                  |

FC: follicular carcinoma. Bold indicates statistically significant ( $p < 0.05$ ).

**Table S3.** Basal characteristics of thyroid medullary carcinoma, poorly differentiated carcinoma and anaplastic carcinoma.

| Parameters         | MC, n = 70 (%) | PDC, n = 23 (%) | AC, n = 8 (%) |
|--------------------|----------------|-----------------|---------------|
| Age (years)        |                |                 |               |
| <45                | 21 (30.0)      | 4 (17.4)        | 0 (0.0)       |
| ≥45                | 49 (70.0)      | 19 (82.6)       | 8 (100.0)     |
| Sex                |                |                 |               |
| Male               | 22 (31.4)      | 10 (43.5)       | 1 (12.5)      |
| Female             | 48 (68.6)      | 13 (56.5)       | 7 (87.5)      |
| Tumor size (cm)    |                |                 |               |
| ≤2.0               | 53 (75.7)      | 8 (34.8)        | 0 (0.0)       |
| >2.0, ≤4.0         | 14 (20.0)      | 9 (39.1)        | 1 (12.5)      |
| >4.0               | 3 (4.3)        | 6 (26.1)        | 7 (87.5)      |
| Tumor margin       |                |                 |               |
| Infiltrative       | 45 (64.3)      | 17 (73.9)       | 8 (100.0)     |
| Expanding          | 25 (35.7)      | 6 (26.1)        | 0 (0.0)       |
| Tumor extension    |                |                 |               |
| Intrathyroidal     | 52 (74.3)      | 11 (47.8)       | 0 (0.0)       |
| Extrathyroidal     | 18 (25.7)      | 12 (52.2)       | 8 (100.0)     |
| LN metastasis      |                |                 |               |
| No                 | 47 (67.1)      | 22 (95.7)       | 4 (50.0)      |
| Yes                | 23 (32.9)      | 1 (4.3)         | 4 (50.0)      |
| Distant metastasis |                |                 |               |
| No                 | 67 (95.7)      | 16 (69.6)       | 8 (100.0)     |
| Yes                | 3 (4.3)        | 7 (30.4)        | 0 (0.0)       |
| Treatment          |                |                 |               |
| No treatment       | 61 (87.1)      | 7 (30.4)        | 2 (25.0)      |
| I-131 therapy      | 4 (5.7)        | 9 (39.1)        | 0 (0.0)       |
| Chemotherapy       | 2 (2.9)        | 2 (8.7)         | 1 (12.5)      |
| Radiotherapy       | 3 (4.3)        | 5 (21.7)        | 5 (62.5)      |

MC: medullary carcinoma; PDC: poorly differentiated carcinoma; AC: anaplastic carcinoma.
